# Supplementary material
Source: publisher figshare collection journal article supplement (https://springernature.figshare.com/ndownloader/files/14353469)
Supplement: Supplementary file [file 14353469]

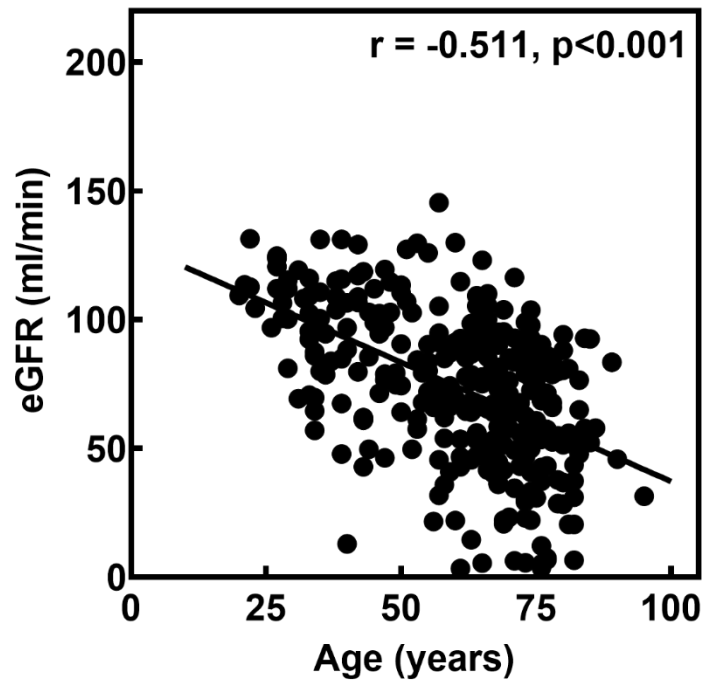

**Additional figure 1. Correlation between eGFR and age in patients prescribed MgO and tested for serum Mg levels (n=320).**

Statistical analysis was performed using Spearman correlation coefficient. Each point represents a patient.
